# Supplementary material for: The preventive effect of mussel oil on gestational diabetes mellitus in pregnant mice fed by a high-fat and high-sucrose diet
Source: Royal Society of Chemistry journal article supplement (doi:10.1039/d2fo03320h), 2022-12-12
Supplement: d2fo03320h1.xlsx [file d2fo03320h1.xlsx]

## Sheet: Raw data
Group	Name of group	No.	Body weight E0.5d	Body weight E3.5d	Body weight E6.5d	Body weight E9.5d	Body weight E12.5d	Body weight E15.5d	Body weight E18.5d	OGTT0	OGTT15	OGTT30	OGTT60	OGTT90	OGTT-AUC	ITT0	ITT30	ITT60	ITT90	ITT120	ITT-AUC	Insulin	FBG	HOMA-IR	HbA1c	IL-6	IL-10	TNF-α	TG	TC	LDL-C	HDL-C	C14:0	C15:0	C16:0	C16:1n-7	C17:0	C18:0	C18:1n-9	C18:2n-6	C18:3n-3	C20:0	C20:1n-9	C20:2n-6	C20:3n-6	C20:4n-6	C20:5n-3	C22:1n-9	C22:5n-3
1	Normal diet+CO	18	20.76	20.65	21.05	21.91	24.39	27.28	33.44	10.1	10.8	10.8	9.6	9.2	906.75	3.3	2.1	5.2	4.3	5.7	483	28.6746	4.55	5.79864	282.877	91.3478	312.882	434.96	0.516718	1.57341	0.531758	2.28883	0.363	0.105	21.631	0.549	0.129	7.578	18.231	25.154	0.495	0.002	0.005	0.396	0.588	11.526	0.111	0.442	0.147
1	Normal diet+CO	21	20.2	18.9	19.35	20.29	22.66	25.36	31	9.4	16.3	14.7	8.8	9.5	1052.25	3.7	2.7	2.9	3.4	2.5	363	26.1156	7.8	9.05339	327.236	90.7194	302.339	517.292	0.956695	1.64514	0.588909	2.2299	0.5	0.083	20.369	2.222	0.02	1.126	25.566	35.826	0.951	0.01	0.039	0.329	0.395	5.714	0.082	0.215	0.038
1	Normal diet+CO	19	21.83	21.88	21.39	23.07	25.18	28.02	33.55	9.9	12.1	11.6	9.3	10.4	951.75	3.1	2.1	2.9	3.2	4.1	354	33.8359	8.5	12.7824	399.46	129.98	386.301	800.671	1.37194	2.24133	0.437333	1.69708	0.672	0.112	28.989	2.997	0.009	1.004	26.829	14.058	2.126	0.009	0.023	0.338	0.29	10.473	0.008	0.383	0.257
1	Normal diet+CO	53	21.84	21.93	21.76	22.69	26.02	27.02	32.27	7.6	13.3	15.2	7.7	7.4	940.5	3	2.1	3.5	3.2	3.3	358.5	27.6011	6.25	7.66699	337.589	61.5571	318.612	462.133	0.563614	3.96715	0.32303	4.12543	0.266	0.503	19.317	1.251	0.459	2.98	18.711	33.868	1.111	0.069	0.053	0.133	0.126	3.563	0.358	12.034	0.501
1	Normal diet+CO	51	19.76	19.73	19.7	20.74	22.31	24.74	26.76	6.3	12.7	16.3	7.16	6.4	915.3	6.55	3.9	3.5	3.4	3.8	479.3	28.1475	8.3	10.3833	352.039	93.752	322.656	471.286	0.573846	0.895038	0.313091	1.81254	0.552	0.623	21.237	1.283	0.597	3.291	23.371	29.145	0.227	0.248	0.14	0.108	0.151	3.383	0.098	10.974	0.471
1	Normal diet+CO	33	20.3	20.86	22.07	22.95	28.13	29.5	30.1	8.7	22.3	18.4	14	8.4	1359.75	8.7	3.7	3.5	3.8	3.6	514.5	26.1251	9.4	10.9145	366.762	76.6562	311.113	519.584	1.55186	7.10651	0.848162	2.78677	0.711	2.89	20.311	0.845	0.898	5.543	17.08	25.75	0.283	0.181	0.136	0.07	0.203	4.809	0.364	15.773	0.082
1	Normal diet+CO	20	23.12	24.6	24.56	24.32	27.94	30.86	29.48	9.4	21.9	17.9	13.8	12.7	1406.25	7.1	3.2	4.8	4.6	5.2	562.5	26.5181	9.7	11.4322	356.833	95.9538	319.501	566.778	0.856933	4.27496	0.634465	2.54502	0.459	0.079	19.435	1.552	0.03	2.177	27.472	30.777	0.861	0.003	0.01	0.287	0.077	6.814	0.087	0.328	0.274
2	HFHS+CO	10	20.82	21.96	23.17	23.25	26.32	30.74	32.87	9.8	17.4	24.5	21.8	16.5	1787.25	10	8.8	7.3	10.6	10.9	1114.5	29.3743	8.45	11.0317	360.686	102.66	350.777	525.938	0.599	1.82892	0.44396	2.92148	0.488	0.068	20.781	2.089	0.011	0.743	37.694	28.113	0.478	0.017	0.012	0.388	0.128	4.209	0.033	0.34	0.051
2	HFHS+CO	14	18.76	19.97	19.1	19.39	22.73	26.6	29.8	6.3	25.3	32.7	25.7	13	2128.5	6.7	7.4	6.1	5.4	5.23	745.95	31.5404	7.7	10.7938	395.032	107.605	365.131	659.136	0.578962	1.61824	0.338768	2.41151	0.627	0.065	22.164	2.055	0.005	0.074	35.177	26.82	0.544	0.045	0.184	0.292	0.152	5.772	0.055	0.324	0.325
2	HFHS+CO	33	21.05	22.27	21.61	22.6	26.39	29.2	32.92	7.8	22.7	16.2	10.9	13.05	1286.25	7.6	4.5	6.5	6.8	6.9	751.5	29.9206	7.8	10.3725	374.97	107.737	354.14	550.621	0.416955	1.50916	0.334626	1.70911	0.442	0.08	21.846	2.703	0.025	1.189	36.294	25.709	0.457	0.02	0.022	0.366	0.296	5.497	0.026	0.14	0.18
2	HFHS+CO	15	25.78	25.87	23.14	24.06	27.26	29.88	33.65	9.85	29.9	23.35	13.75	13.6	1664.25	7.7	3.9	4.2	6.7	8.2	682.5	29.6331	7.15	9.41673	333.536	92.4244	343.074	564.107	0.377733	2.25926	0.344566	2.66649	0.45	0.073	20.619	2.21	0.017	0.594	37.332	26.031	0.403	0.011	0.018	0.38	0.114	4.854	0.041	0.17	0.193
2	HFHS+CO	16	19.52	19.7	19.96	19.87	22.03	24.06	27.82	16.2	17	17.6	10.2	10.5	1236	6.9	5.1	3.8	4	3.9	549	29.8631	8	10.618	301.209	99.4255	339.004	603.179	0.547414	1.9634	0.450586	1.84021	0.555	0.074	18.683	2.249	0.014	1.26	32.416	27.754	0.574	0.018	0.02	0.312	0.103	5.478	0.062	4.384	0.323
2	HFHS+CO	27	18.88	19.51	19.86	20.17	23.5	27.8	30.08	9.1	22.2	24.7	15	10.6	1566	6.7	4.7	5.1	4.9	5.3	621	33.371	9.5	14.09	391.738	134.574	353.061	734.288	0.764844	1.92754	0.375212	2.58832	0.719	0.073	19.857	3.373	0.047	0.702	30.828	29.439	0.633	0.005	0.025	0.274	0.189	5.106	0.106	1.442	0.311
2	HFHS+CO	2	19.84	19.19	19.35	20.54	22.85	27.6	31.02	12.5	21.3	26.1	14.9	13.6	1651.5	9.6	3	4.5	2.8	3.1	499.5	28.1762	9.25	11.5836	311.251	79.5794	297.285	453.062	2.14873	4.33174	1.35259	4.47663	0.621	0.085	14.791	9.57	0.01	0.484	37.073	28.613	0.591	0.014	0.027	0.37	0.098	3.883	0.056	0.067	0.277
2	HFHS+CO	44	18.24	18.38	18.36	19.14	21.63	24.42	25.1	8.8	21.7	30.25	21.2	10.1	1859.62	4.7	3.9	3.6	4.8	5.1	516	27.0548	6.25	7.51523	337.261	96.4219	327.664	528.2	0.640355	0.790442	0.219495	1.82938	0.588	0.069	19.284	2.488	0.01	0.483	34.978	29.649	0.392	0.023	0.027	0.254	0.228	4.332	0.135	0.484	0.317
3	HFHS+FO	5	20.48	20.43	15.2	19.9	24.06	28.32	31.8	6.65	22.2	18.4	11.15	8.65	1261.12	4.4	3.8	5.6	4.7	4.6	558	31.8567	8.15	11.5392	360.638	97.6399	333.615	570.171	0.704305	1.46583	0.466323	1.47096	0.464	0.374	22.147	1.136	0.048	3.02	21.292	16.828	0.105	0.327	0.144	0.181	0.159	3.775	2.926	1.3	2.454
3	HFHS+FO	9	21.93	22.35	22.23	22.75	26.27	30.08	33.33	7.7	20.5	16.7	11.45	13.2	1282.5	7.9	5.9	5.6	3.7	4.2	637.5	32.2209	7.2	10.3107	359.362	96.4837	355.89	572.456	0.534197	1.56146	0.477091	2.33935
3	HFHS+FO	6	20.92	19.96	20.52	21.34	20.8	25.93	28.6	8	22	22.8	13	8.9	1426.5	8.5	3.6	3.15	3.1	3.7	478.5	34.4157	7.05	10.7836	319.368	102.608	345.593	613.033	1.02406	3.22602	0.838222	1.81856	0.64	0.112	20.999	2.005	0.092	5.885	24.088	15.718	0.763	0.193	0.031	0.079	0.102	4.842	4.137	0.082	1.032
3	HFHS+FO	14	18.67	19.29	20.08	21.1	26.2	27.18	27.8	4.7	24.5	26.2	16.7	7.05	1599	4.65	4.9	4.55	3.9	3.8	527.25	30.7545	6.65	9.08965	335.656	62.1425	359.727	560.257	0.801083	1.31192	0.510222	1.98213
3	HFHS+FO	48	20.69	20.78	21.69	22.46	25.26	27.78	31.18	7.65	21.15	26.5	15.9	9.1	1584.38	8.2	4.1	3.9	4.1	4.3	550.5	30.9749	8.55	11.7705	351.238	82.4182	343.465	508.964	0.999755	3.53981	0.660141	4.0256	0.637	0.069	21.238	1.63	0.05	1.541	26.086	18.487	0.834	0.113	0.214	0.258	0.146	2.66	3.347	0.89	2.283
3	HFHS+FO	25	18.7	19.54	20.4	20.77	23.41	26.47	28.88	10.6	25.4	21.5	14.1	11.6	1541.25	8.25	6.4	5.9	6	11.8	849.75	29.8056	9.5	12.5846	377.553	100.006	351.344	609.272	0.883792	4.84277	0.962465	3.98832	0.523	0.083	21.645	0.975	0.072	6.116	23.971	17.381	0.809	0.09	0.144	0.204	0.155	4.005	3.414	1.253	0.813
3	HFHS+FO	49	18.56	19.16	19.76	20.92	23.1	26.04	28.32	5.5	18.2	18	11.9	10.4	1232.25	7.9	3.9	3.3	3.1	3.1	474	31.3104	5.55	7.72322	352.186	109.79	354.637	616.392	0.987391	3.17372	0.937616	2.19983	0.722	0.14	23.665	2.561	0.046	3.586	26.464	16.158	0.878	0.052	0.826	0.126	0.103	1.954	3.243	0.167	0.945
4	HFHS+MO	23	20.14	21.16	21.64	20.91	23.9	24.37	25.17	5.5	17.3	14.9	17.2	8.1	1273.5	6.3	4.1	3.8	3.7	3.7	498	25.991	4.35	5.02492	329.919	114.84	323.975	597.109	0.92472	6.39675	1.35093	0.135911
4	HFHS+MO	30	20.84	22.2	22.85	24.07	27.62	28.34	33.5	5.7	19.8	25.2	10.3	7.2	1323.75	6.8	4.3	4.3	3.9	4.2	540	27.0165	3	3.6022	357.886	94.5853	306.638	548.653	2.2536	1.35526	0.352848	0.441409
4	HFHS+MO	35	21.22	21.18	20.74	21.76	29.4	31.46	32	3.7	16.8	16	10.8	6.6	1062.75	7.1	4.6	4	2.88	3.7	506.4	28.6075	4.55	5.78508	272.221	76.9961	286.088	570.253	0.306535	1.35825	0.420768	4.91203	0.855	0.099	18.386	2.564	0.013	0.753	30.35	15.643	0.668	0.002	0.008	0.054	0.013	2.395	0.045	0.654	0.232
4	HFHS+MO	36	22.53	22.11	23.27	24.82	31	32.32	32.4	2.9	19.3	18.4	10.2	6.6	1130.25	6.2	5.6	3.4	3.5	4.1	529.5	23.7961	5	5.28802	357.979	101.692	345.075	581.927	0.174797	1.27905	0.324687	1.12337	0.899	0.033	18.527	2.781	0.034	1.939	31.094	13.811	0.659	0.001	0.027	0.139	0.114	2.068	2.894	0.611	0.629
4	HFHS+MO	8	21.06	21.42	21.91	22.21	23.63	24.52	25.26	8	23.6	18.4	13.7	9.1	1375.5	4.8	3.1	3.1	3	3.7	403.5	23.1923	10.7	11.0292	345.393	90.0896	352.629	571.561	0.692794	3.80727	1.02293	2.9311	0.407	0.089	17.72	0.957	0.069	3.872	17.379	14.564	0.767	0.074	0.329	0.221	0.093	4.189	5.273	1.352	1.521
4	HFHS+MO	34	18.5	19.13	19.4	20.71	23.82	28.41	30.86	6.8	18.4	18	8.6	7.1	1096.5	4.2	4.2	3.9	3.7	3.8	474	28.32	6.75	8.496	378.854	98.6666	337.096	559.121	0.50947	0.959289	0.317232	1.5756	0.822	0.135	20.476	2.418	0.038	2.315	27.52	15.883	0.963	0.005	0.018	0.165	0.158	2.871	0.093	0.109	1.555
4	HFHS+MO	21	19.51	19.77	20.41	21.19	23.94	28.6	31.27	8.9	19.6	20.7	13.9	8.7	1374	6.6	3.8	3.45	3.35	3.6	471	29.9589	10.7	14.2471	376.017	119.927	344.563	603.711	2.11675	1.24917	0.282444	1.48419	1.103	0.086	26.518	8.41	1.703	1.375	22.294	7.883	0.915	0.819	0.719	0.032	0.086	1.325	1.388	0.324	1.326
[truncated: 13 more columns]
