# Supplementary material for: The preventive effect of mussel oil on gestational diabetes mellitus in pregnant mice fed by a high-fat and high-sucrose diet
Source: Royal Society of Chemistry journal article supplement (doi:10.1039/d2fo03320h), 2022-12-12
Supplement: d2fo03320h2.pdf [file d2fo03320h2.pdf]

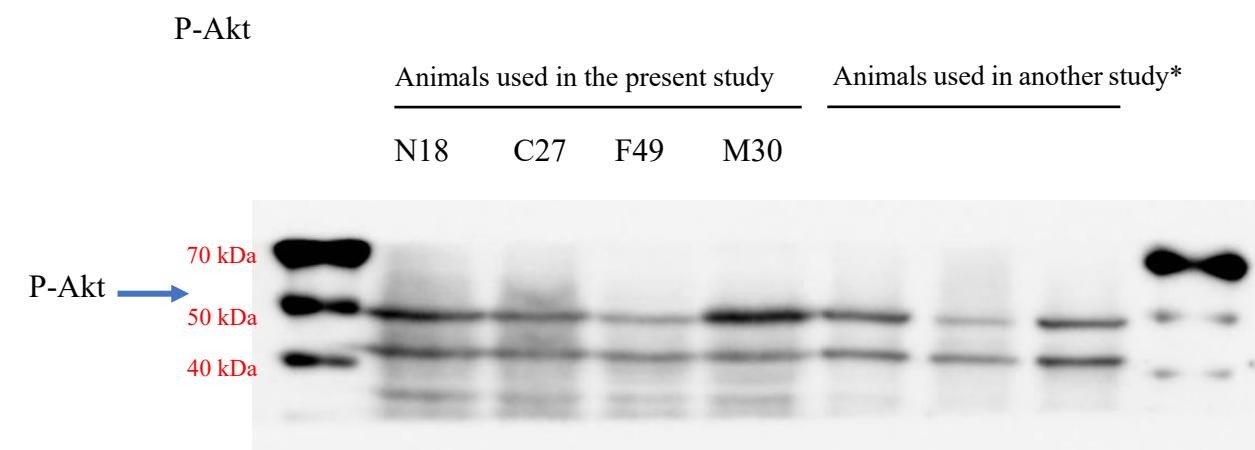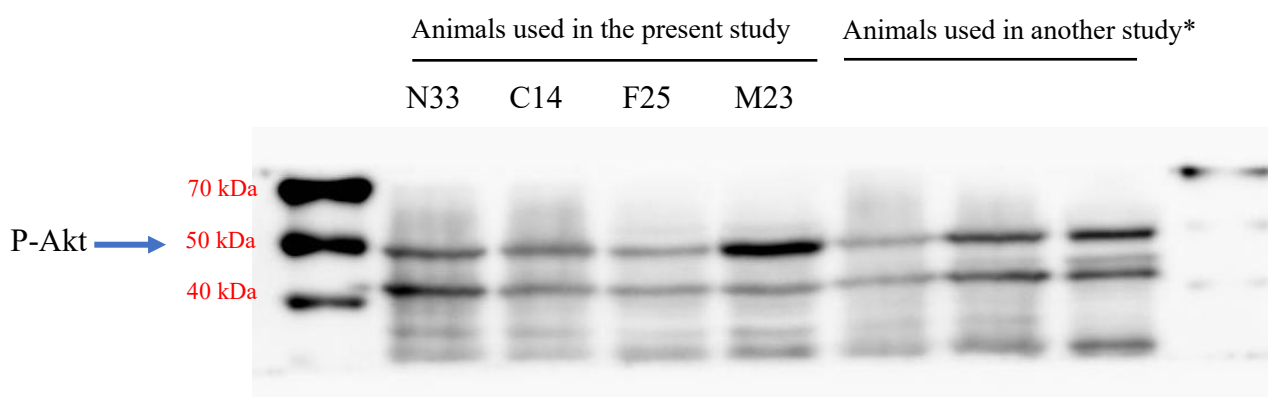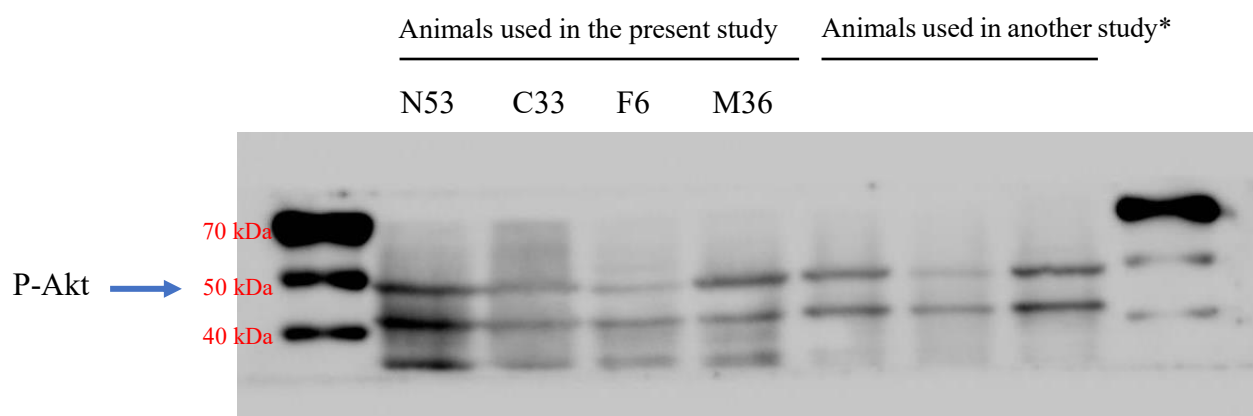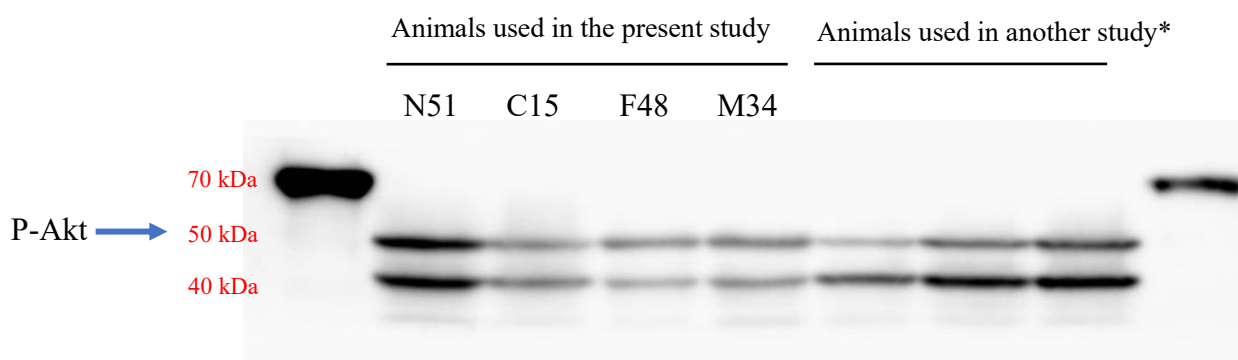

Akt

Animals used in the present study

Animals used in another study\*

N18      C27      F49      M30

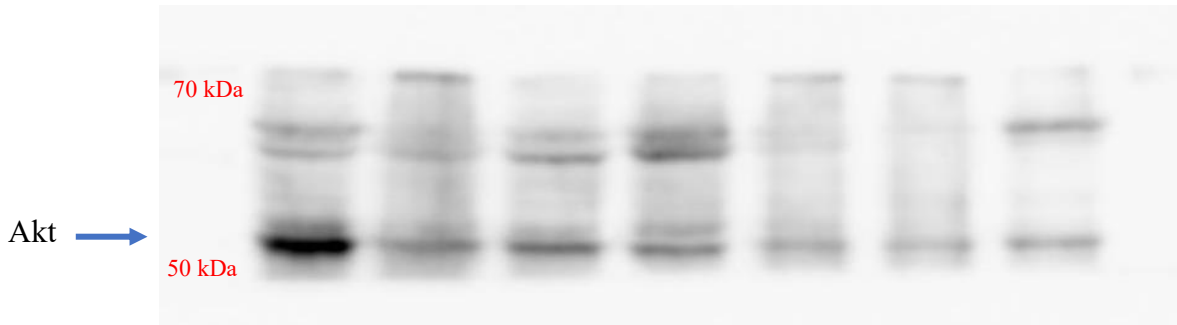

Animals used in the present study

Animals used in another study\*

N33      C14      F25      M23

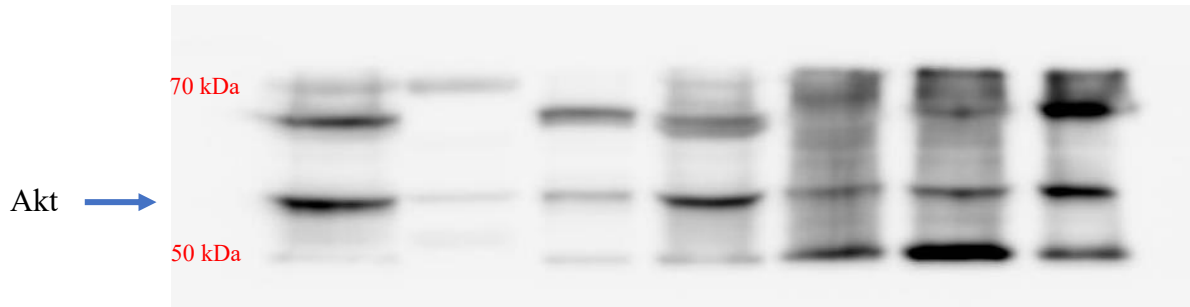

Animals used in the present study

Animals used in another study\*

N53      C33      F6      M36

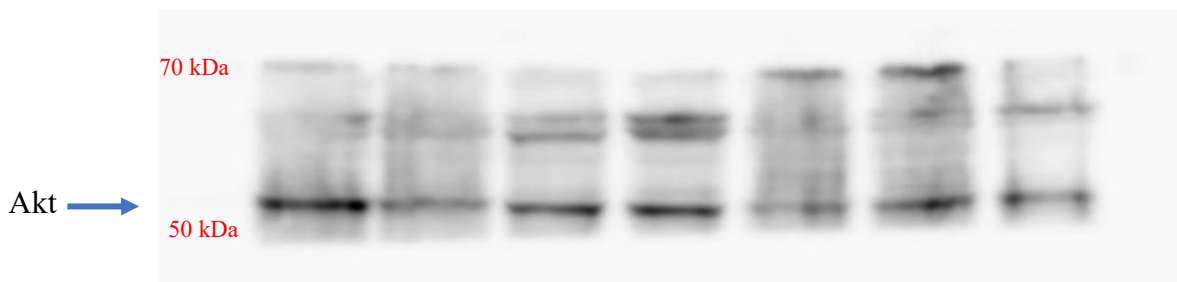

Animals used in the present study

Animals used in another study\*

N51      C15      F48      M34

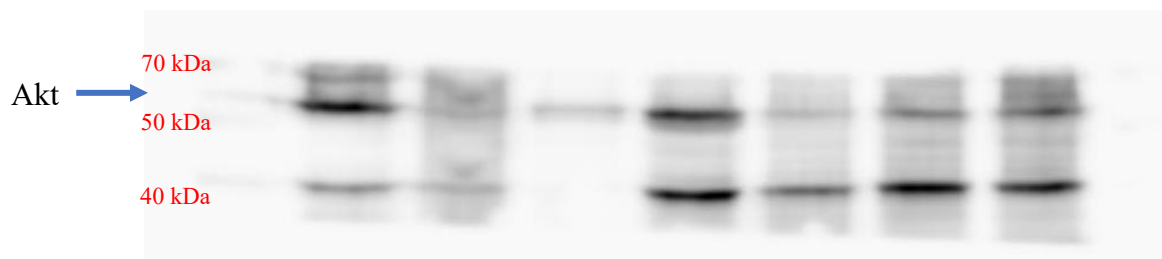

# SphK1

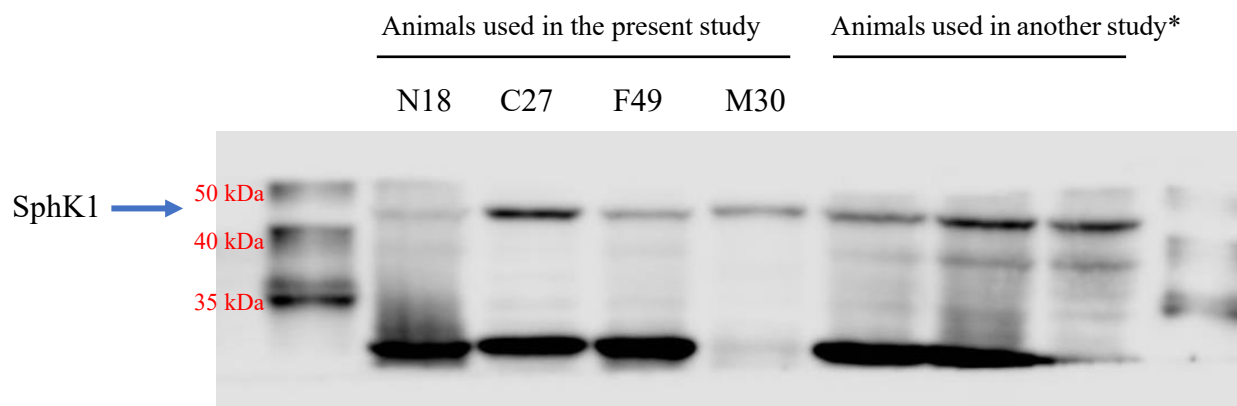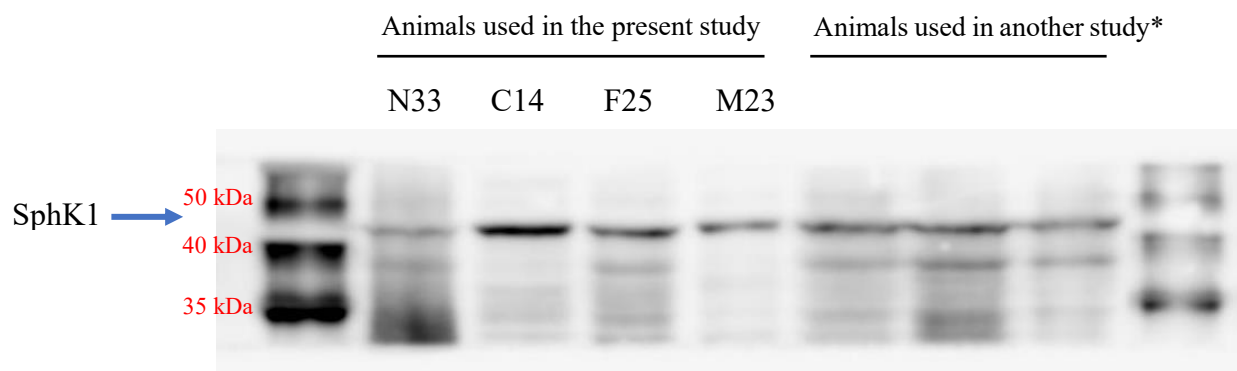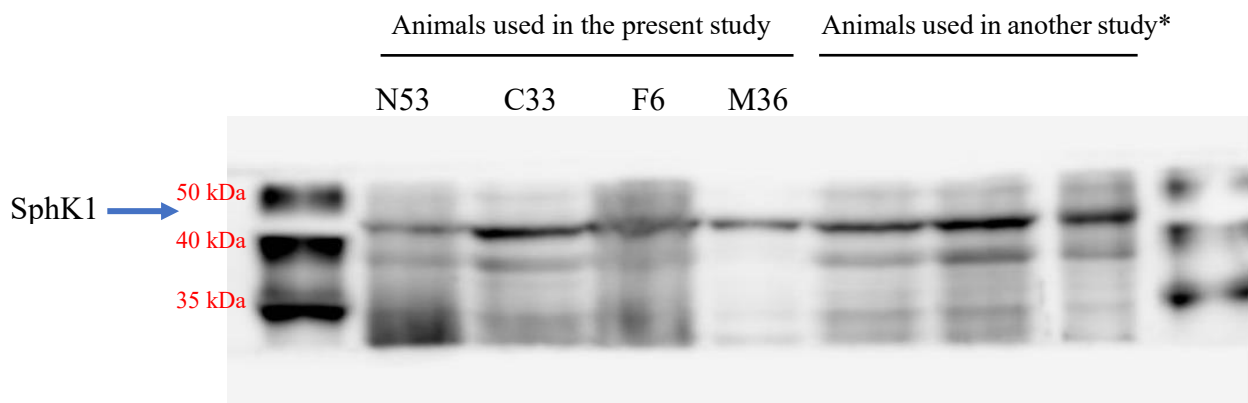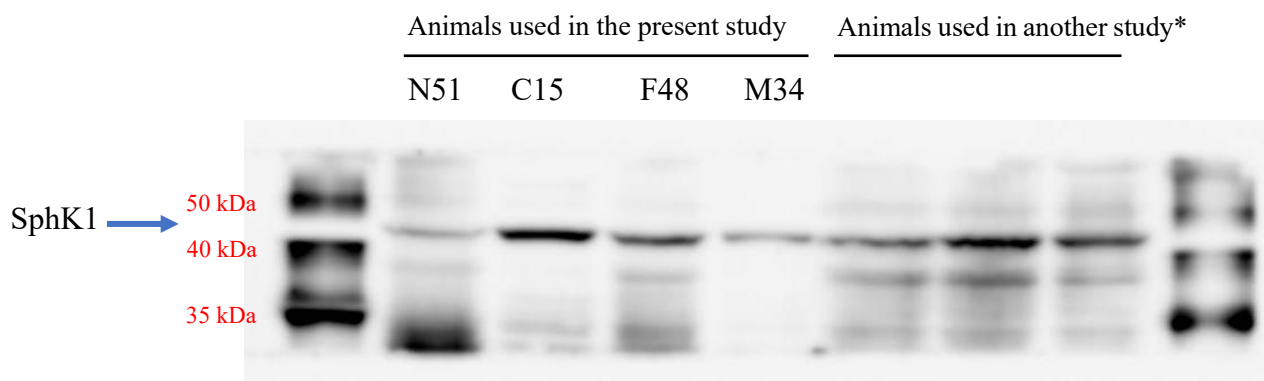

Sphk2

Animals used in the present study

Animals used in another study\*

N18 C27 F49 M30

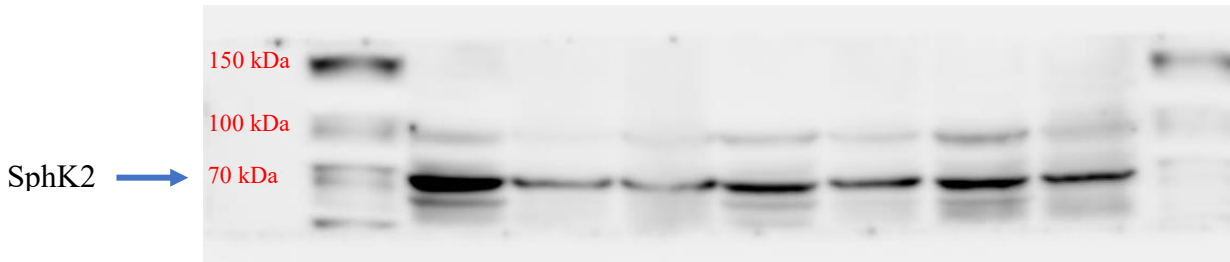

Animals used in the present study

Animals used in another study\*

N33 C14 F25 M23

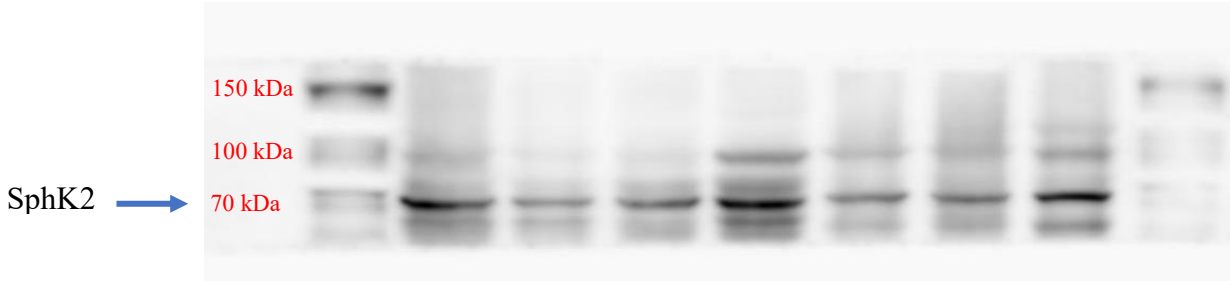

Animals used in the present study

Animals used in another study\*

N53 C33 F6 M36

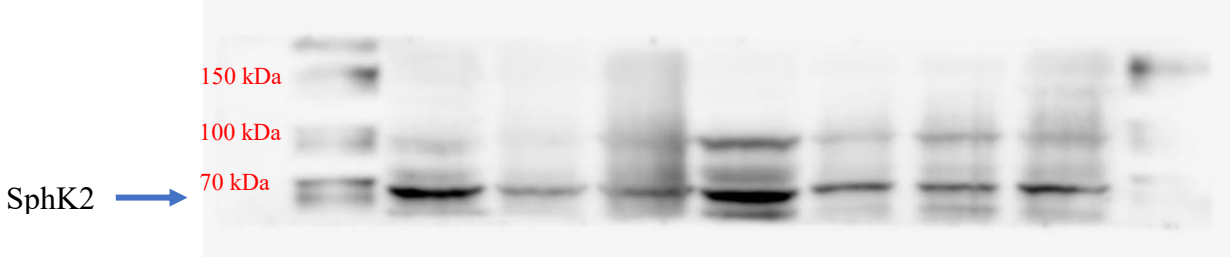

Animals used in the present study

Animals used in another study\*

N51 C15 F48 M34

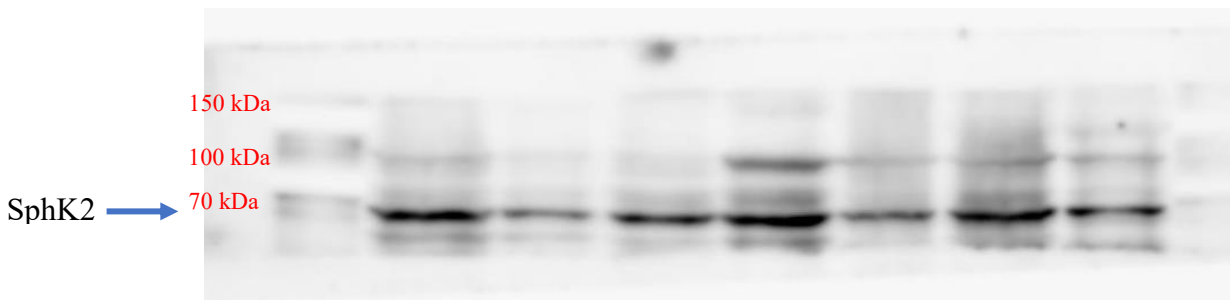

$\beta$ -actin

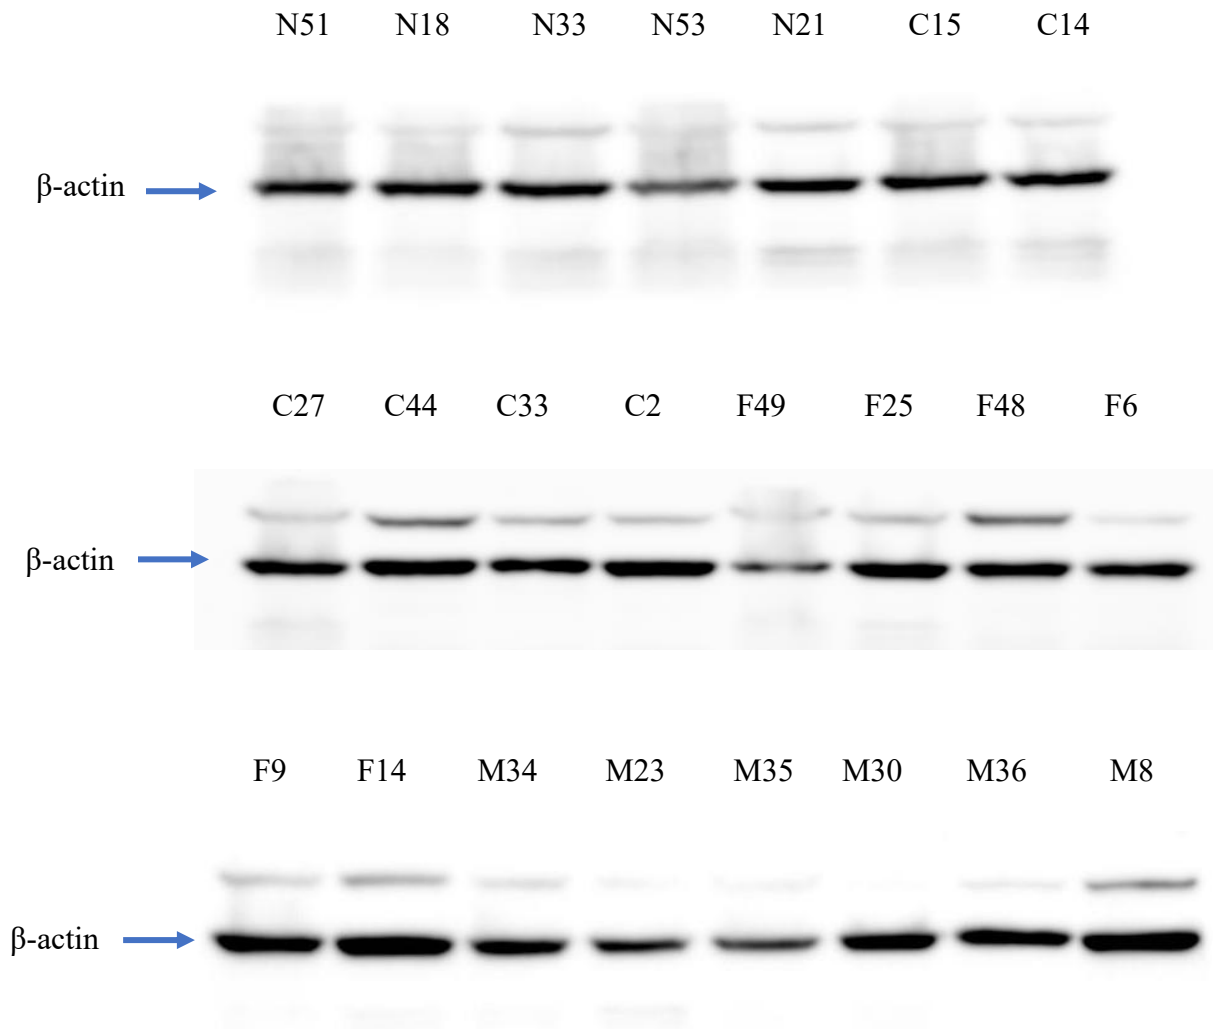

The mice used in the present study are as follows. Normal diet+CO : N51, N33, N18, N53; HFHF+CO: C15, C14, C27, C33; HFHF+FO: F48, F25, F49, F6; HFHF+MO: M34, M23, M30, M36. \*The three groups of mice were not related to the present study, they were used in another study to investigate the effects of fumonisin B<sub>1</sub> on sphingolipid and glucose metabolism.
