# Supplementary material for: The preventive effect of mussel oil on gestational diabetes mellitus in pregnant mice fed by a high-fat and high-sucrose diet
Source: Royal Society of Chemistry journal article supplement (doi:10.1039/d2fo03320h), 2022-12-12
Supplement: d2fo03320h3.pdf [file d2fo03320h3.pdf]

**Table S1.** Composition of AIN-93G and HFHS diets

| Ingredients        | AIN-93G diet | HFHS diet |
|--------------------|--------------|-----------|
| Casein             | 20.00%       | 23.31%    |
| L-cystine          | 0.35%        | 0.35%     |
| Corn starch        | 39.75%       | 8.48%     |
| Maltodextrin       | 13.20%       | 11.65%    |
| Sucrose            | 10.00%       | 20.14%    |
| Cellulose          | 5.00%        | 5.83%     |
| Soybean Oil        | 7.00%        | 2.91%     |
| Lard               | --           | 20.68%    |
| Mineral Mix        | 3.50%        | 5.23%     |
| Vitamin Mix        | 1.00%        | 1.16%     |
| Choline bitartrate | 0.2%         | 0.23%     |

**Table S2.** Fatty acids composition of fish oil, mussel oil and corn oil.

| Fatty acids    | FO    | MO    | CO    |
|----------------|-------|-------|-------|
| C8:0           | 0.09  | ND    | ND    |
| C12:0          | 0.02  | ND    | ND    |
| C14:0          | 2.49  | 3.63  | 0.04  |
| C15:0          | 0.22  | 0.49  | ND    |
| C16:0          | 9.04  | 18.63 | 12.52 |
| C17:0          | 0.47  | 0.65  | 0.08  |
| C18:0          | 3.82  | 2.03  | 1.22  |
| C20:0          | 0.20  | ND    | 0.37  |
| C23:0          | 1.27  | 1.26  | ND    |
| Total SFA      | 17.62 | 26.69 | 14.23 |
| C14:1n-5       | 0.01  | 0.11  | ND    |
| C16:1n-7       | 5.81  | 11.48 | 0.15  |
| C17:1n-7       | ND    | 0.48  | 0.04  |
| C18:1n-9       | 20.60 | 3.17  | 29.13 |
| C20:1n-9       | 1.90  | 3.56  | 0.34  |
| C22:1n-9       | 1.38  | ND    | 0.04  |
| Total MUFA     | 29.71 | 18.80 | 29.71 |
| C18:3n-3       | 1.27  | 2.31  | 0.69  |
| C20:3n-3       | 0.40  | 0.17  | ND    |
| C20:5n-3       | 24.37 | 20.99 | ND    |
| C22:5n-3       | 2.17  | 1.09  | ND    |
| C22:6n-3       | 20.04 | 26.74 | ND    |
| Total n-3 PUFA | 48.25 | 51.30 | 0.69  |
| C18:2n-6       | 2.49  | 1.18  | 55.37 |
| C18:3n-6       | 0.38  | ND    | ND    |
| C20:2n-6       | 0.22  | 0.63  | ND    |
| C20:3n-6       | 0.06  | ND    | ND    |
| C20:4n-6       | 1.26  | 1.40  | ND    |
| Total n-6 PUFA | 4.42  | 3.21  | 55.37 |

SFA, saturated fatty acid; MUFA, monounsaturated fatty acid; PUFA, polyunsaturated fatty acid; FO, fish oil; MO, mussel oil; CO, corn oil; ND, not detected or negligible.

**Table S3.** Information for detected sphingolipids in mass spectrum

| Compounds                        | Formula                                           | Precursor ions (m/z) | Product ions (m/z) | CE(V) |
|----------------------------------|---------------------------------------------------|----------------------|--------------------|-------|
| Sphingosine (d18:1)              | C <sub>18</sub> H <sub>37</sub> NO <sub>2</sub>   | 300.2                | 282.2/264.2        | 25    |
| Sphinganine (d18:0)              | C <sub>18</sub> H <sub>39</sub> NO <sub>2</sub>   | 302.2                | 284.2/266.4        | 25    |
| Sphingosine 1-phosphate (d18:1)  | C <sub>18</sub> H <sub>38</sub> NO <sub>5</sub> P | 380.2                | 362.1/264.2        | 32    |
| Sphinganine 1-phosphate (d18:0)  | C <sub>18</sub> H <sub>40</sub> NO <sub>5</sub> P | 382.2                | 266.2/364.2        | 30    |
| Sphinganine (d20:0)*             | C <sub>20</sub> H <sub>43</sub> NO <sub>2</sub>   | 330.2                | 312.3/295.2        | 35    |
| Sphingosine-1-phosphate (d17:1)* | C <sub>17</sub> H <sub>36</sub> NO <sub>5</sub> P | 366.2                | 250.2/348.3        | 30    |

\* Internal standards. CE, collision energy

**Table S4.** Relationship between n-3 PUFA content and glucose and sphingolipids metabolism in liver of mice on HFHS diet.

| Parameters                               | C20:5n-3 |       | C22:6n-3 |       | Total n-3 PUFA |         |
|------------------------------------------|----------|-------|----------|-------|----------------|---------|
|                                          | r        | p     | r        | p     | r              | p       |
| AUC of OGTT                              | -0.150   | 0.553 | -0.633   | 0.005 | -0.598         | 0.009   |
| AUC of ITT                               | -0.457   | 0.056 | -0.594   | 0.009 | -0.531         | 0.023   |
| Fasting blood glucose (mmol/L)           | 0.224    | 0.371 | -0.122   | 0.630 | -0.064         | 0.801   |
| Insulin (mU/L)                           | 0.131    | 0.604 | -0.150   | 0.553 | -0.061         | 0.810   |
| HOMA-IR                                  | 0.232    | 0.354 | -0.162   | 0.521 | -0.090         | 0.723   |
| SphK1 (relative protein level)           | -0.527   | 0.117 | -0.855   | 0.002 | -0.830         | 0.003   |
| SphK2 (relative protein level)           | 0.588    | 0.074 | 0.867    | 0.001 | 0.903          | < 0.001 |
| P-Akt (relative protein level)           | -0.212   | 0.556 | 0.394    | 0.260 | 0.406          | 0.244   |
| Akt (relative protein level)             | 0.127    | 0.726 | 0.673    | 0.033 | 0.661          | 0.038   |
| Sphingosine (pmol/mg tissue)             | 0.165    | 0.573 | 0.007    | 0.982 | 0.125          | 0.670   |
| Sphinganine (pmol/mg tissue)             | 0.495    | 0.072 | 0.358    | 0.208 | 0.490          | 0.075   |
| Sphingosine 1-phosphate (pmol/mg tissue) | -0.464   | 0.095 | -0.297   | 0.303 | -0.345         | 0.227   |
| Sphinganine 1-phosphate (pmol/mg tissue) | -0.556   | 0.039 | -0.341   | 0.233 | -0.204         | 0.483   |

Data were expressed as Spearman correlation coefficient and corresponding p value. HFHS, high-fat and high-sucrose; AUC, area under curve; PUFA, polyunsaturated fatty acids; OGTT, oral glucose tolerance test; ITT, insulin tolerance test; homeostasis model assessment-insulin resistance; SphK, sphingosine kinase.

**Table S5.** Biochemical parameters and inflammatory factors in serum.

| Parameters            | Groups                  |                  |                  |                  | p     |
|-----------------------|-------------------------|------------------|------------------|------------------|-------|
|                       | Normal diet+CO<br>(n=7) | HFHS+CO<br>(n=8) | HFHS+FO<br>(n=7) | HFHS+MO<br>(n=7) |       |
| TG (mmol/L)           | 0.91 ± 0.41             | 0.76 ± 0.57      | 0.85 ± 0.18      | 1.00 ± 0.85      | 0.867 |
| TC (mmol/L)           | 3.10 ± 2.17             | 2.03 ± 1.03      | 2.73 ± 1.33      | 2.34 ± 2.03      | 0.642 |
| HDL-C (mmol/L)        | 2.50 ± 0.81             | 2.56 ± 0.90      | 2.55 ± 1.04      | 1.80 ± 1.64      | 0.536 |
| LDL-C (mmol/L)        | 0.53 ± 0.19             | 0.48 ± 0.36      | 0.69 ± 0.22      | 0.58 ± 0.43      | 0.615 |
| IL-6 (pg/mL)          | 91.42 ± 20.91           | 102.55 ± 15.84   | 93.01 ± 15.92    | 99.54 ± 14.59    | 0.549 |
| IL-10 (pg/mL)         | 324.77 ± 27.95          | 341.27 ± 21.02   | 349.18 ± 8.93    | 328.01 ± 24.10   | 0.145 |
| TNF- $\alpha$ (pg/mL) | 538.96 ± 123.43         | 577.32 ± 87.33   | 578.65 ± 38.40   | 576.05 ± 19.72   | 0.741 |

HFHS, high-fat and high-sucrose; FO, fish oil; MO, mussel oil; CO, corn oil

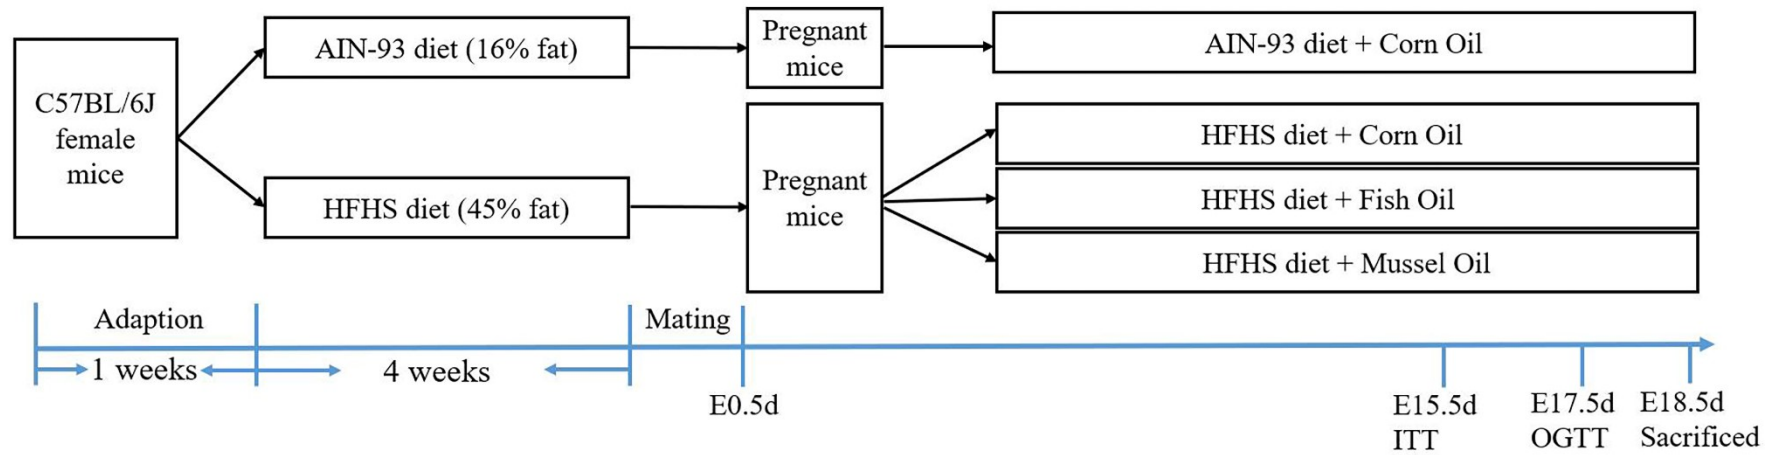

**Figure S1.** Diagram of study design. HFHS, high-fat and high-sucrose; ITT, insulin tolerance test; OGTT, oral glucose tolerance test.

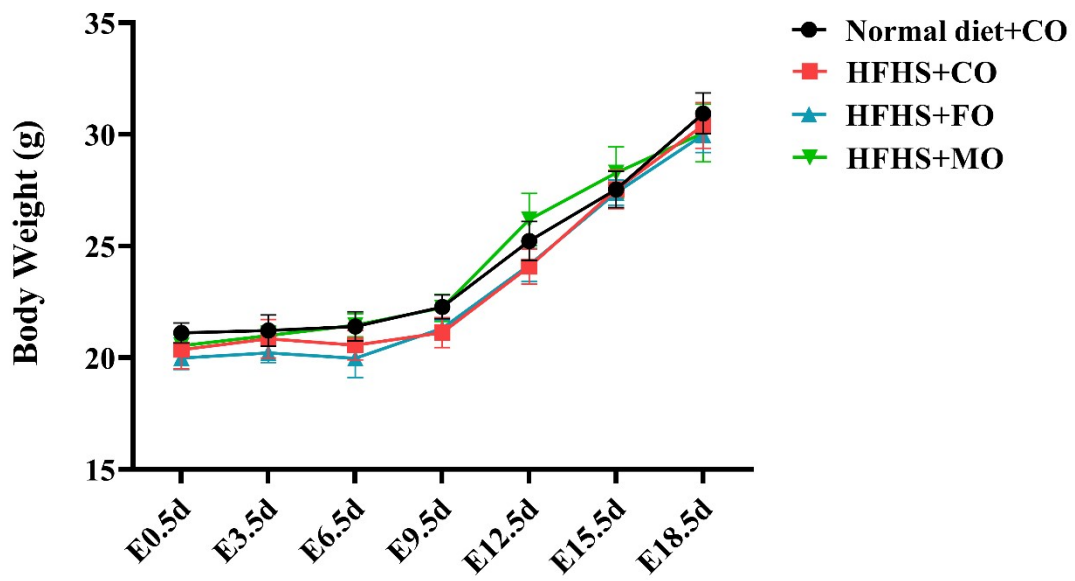

**Figure S2.** Body weight of mice during pregnancy (normal diet+CO, n=7; HFHS+CO, n=8; HFHS+FO, n=7; HFHS+MO, n=7). Data were expressed as mean  $\pm$  SEM. HFHS, high-fat high-sucrose diet; CO, corn oil; FO, fish oil; MO, mussel oil.

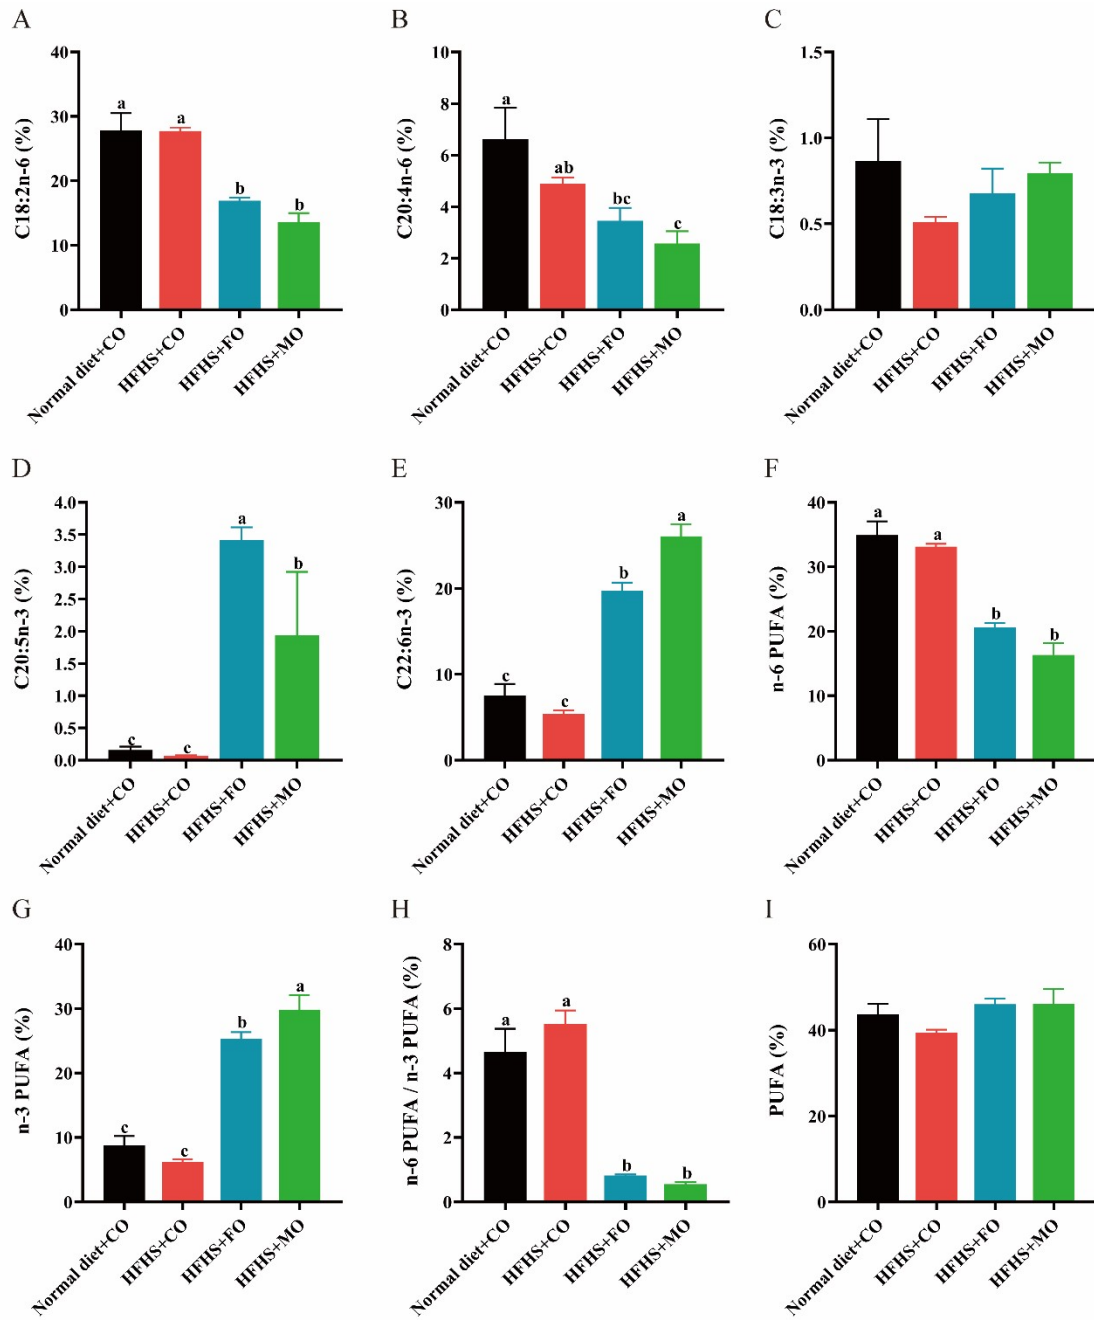

**Figure S3.** Fatty acids composition in liver of pregnant mice (normal diet+CO, n=7; HFHS+CO, n=8; HFHS+FO, n=5; HFHS+MO, n=5). Data were expressed as mean  $\pm$  SEM. HFHS, high-fat high-sucrose diet; CO, corn oil; FO, fish oil; MO, mussel oil.
